# Supplementary material for: Fabrication of a highly elastic nanocomposite hydrogel by surface modification of cellulose nanocrystals
Source: Royal Society of Chemistry journal article supplement (doi:10.1039/c4ra10748a), 2015-01-01
Supplement: c4ra10748a1.pdf [file c4ra10748a1.pdf]

## SUPPORTING INFORMATION

### Fabrication of highly elastic nanocomposite hydrogel by surface modification of cellulose nanocrystal

*Dong Yang, † Xinwen Peng, † Linxin Zhong, \* † Xuefei Cao, † Wei Chen, † Sha Wang, † Chuanfu Liu, † and Runcang Sun\*, †, ‡*

Table S1. Acylation conditions of CNCs and their DS.

| Sample | Oxidized CNCs (mg) | AC or UC addition (mL) | T (°C) | DS   | Zeta potential (mV) |
|--------|--------------------|------------------------|--------|------|---------------------|
| CNC    | -                  | -                      | -      | -    | -40.3               |
| CNC-T  | -                  | -                      | -      | -    | -59.5               |
| AC-T-1 | 100                | 0.3                    | 55     | 0.08 | -                   |
| AC-T-2 | 100                | 0.5                    | 55     | 0.24 | -58.4               |
| AC-T-3 | 100                | 0.7                    | 55     | 0.28 | -                   |
| UC-T-1 | 100                | 0.6                    | 30     | 0.10 | -                   |
| UC-T-2 | 100                | 0.8                    | 30     | 0.20 | -                   |
| UC-T-3 | 100                | 1.0                    | 30     | 0.25 | -57.1               |

Table S2. Synthesis conditions of hydrogels.

| Sample | AM (g) | Addition of CNCs (mmol <sup>a</sup> ) | MBA (mmol) | C=C groups in crosslink agent (mmol) |
|--------|--------|---------------------------------------|------------|--------------------------------------|
| B      | 3.0    | -                                     | 0.05       | 0.16                                 |
| A1     | 3.0    | 1.00                                  | -          | 0.24                                 |
| A2     | 3.0    | 0.50                                  | -          | 0.12                                 |
| A3     | 3.0    | 0.25                                  | -          | 0.06                                 |
| U1     | 3.0    | 1.00                                  | -          | 0.25                                 |
| U2     | 3.0    | 0.50                                  | -          | 0.13                                 |
| U3     | 3.0    | 0.25                                  | -          | 0.06                                 |

<sup>a</sup> The amount of modified glucose ring.

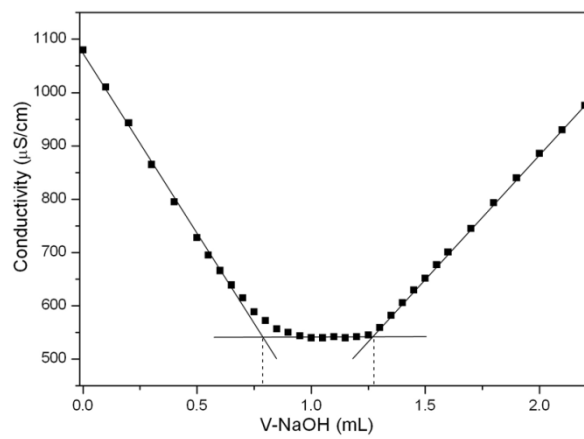

Figure S1. Conductometric titration curve of TEMPO oxidized CNCs
